# Supplementary material for: Correlation Between Proprioceptive Impairment and Motor Deficits After Stroke: A Meta-Analysis Review
Source: PubMed Central journal article supplement (PMC8793362; doi:10.3389/fneur.2021.688616), 2022-01-13
Supplement: Data_Sheet_1.pdf [file Data_Sheet_1.pdf]

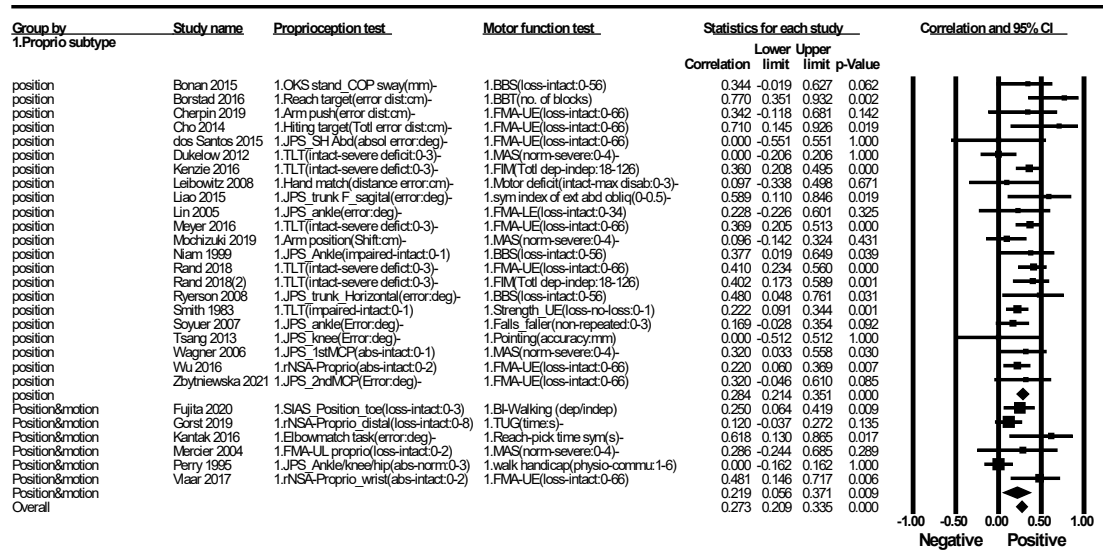

(A) Random-effect model of analysis:  $I^2=33\%$ ,  $59\%^*$  across studies measuring position sense, combined position and motion senses respectively. (\*:p<0.05)

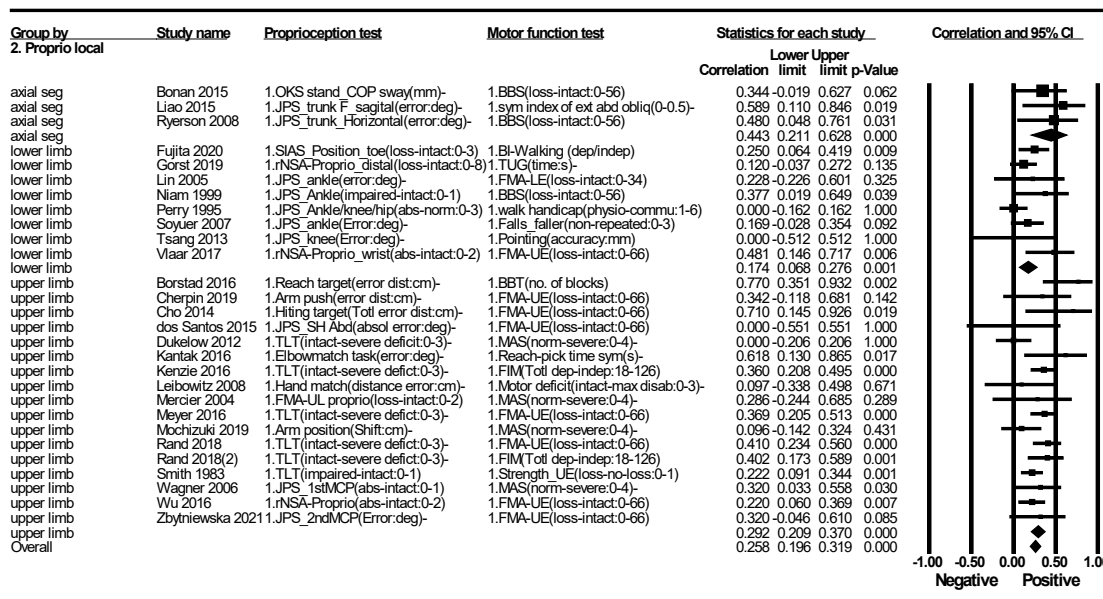

(B) Random-effect model of analysis:  $I^2=0\%$ ,  $43\%^*$ ,  $33\%$  across studies measuring proprioception in axial segment, upper limbs and lower limbs respectively. (\*:p<0.05)

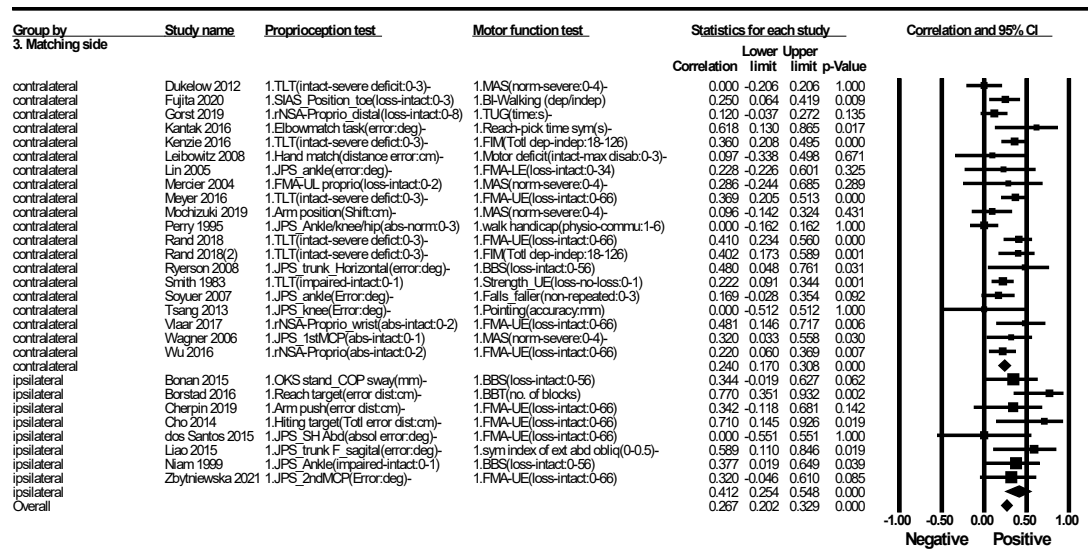

(C) Random-effect model of analysis:  $I^2=47\%^*$ , 9% across studies measuring proprioception in contralateral matching and ipsilateral matching respectively. (\*:p<0.05)

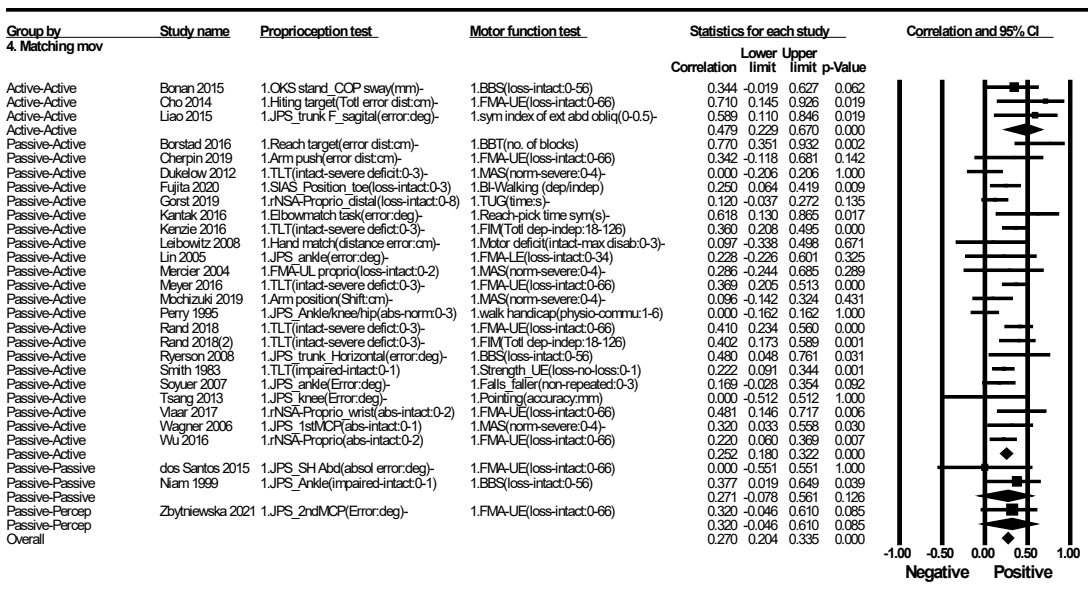

(D) Random-effect model of analysis:  $I^2=0\%$ , 50%\*, 13%, 0% across studies measuring proprioception in different movement modes respectively. (\*:p<0.05)

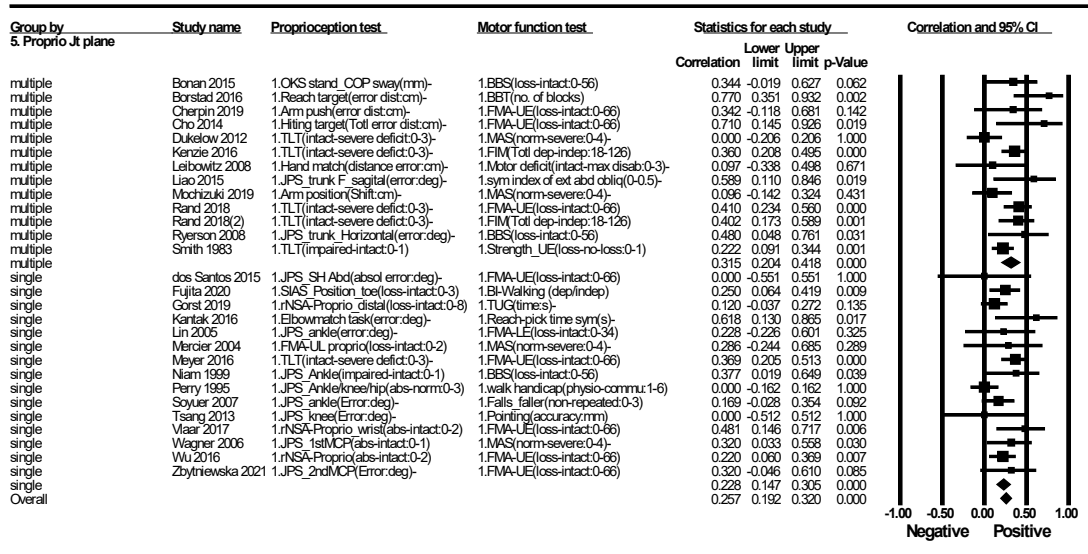

(E) Random-effect model of analysis:  $I^2=54\%^*$ , 31% across studies measuring proprioception in single and multiple joint planes respectively. (\*:p<0.05)

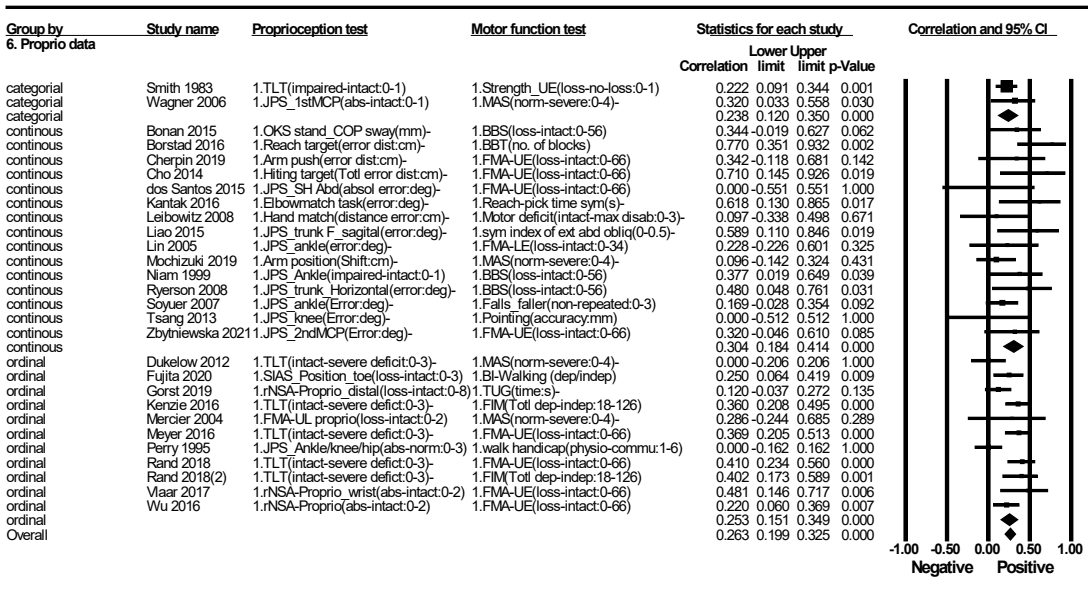

(F) Random-effect model of analysis:  $I^2=0\%$ , 27%, 65%\* across studies measuring proprioception with continuous, ordinal and categorical data as results respectively. (\*:p<0.05)

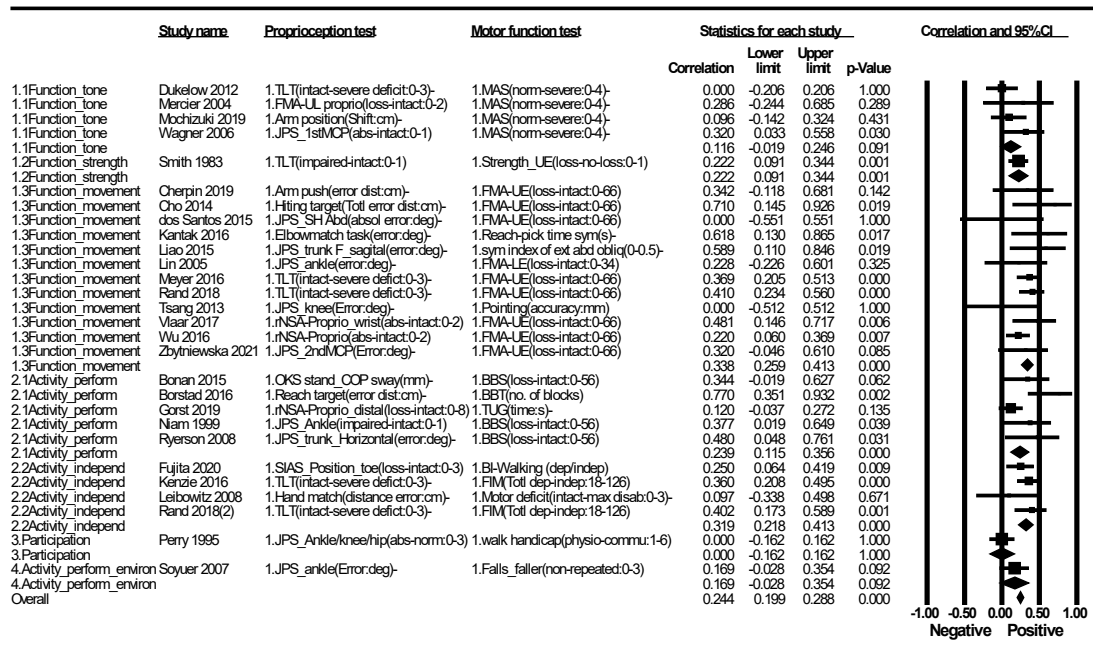

(G) Random-effect model of analysis:  $I^2=17\%$ , 0%, 7%, 60%\*, 0%, 0% across studies measuring motor function in ICF domains 1-4 respectively. (\*:p<0.05)

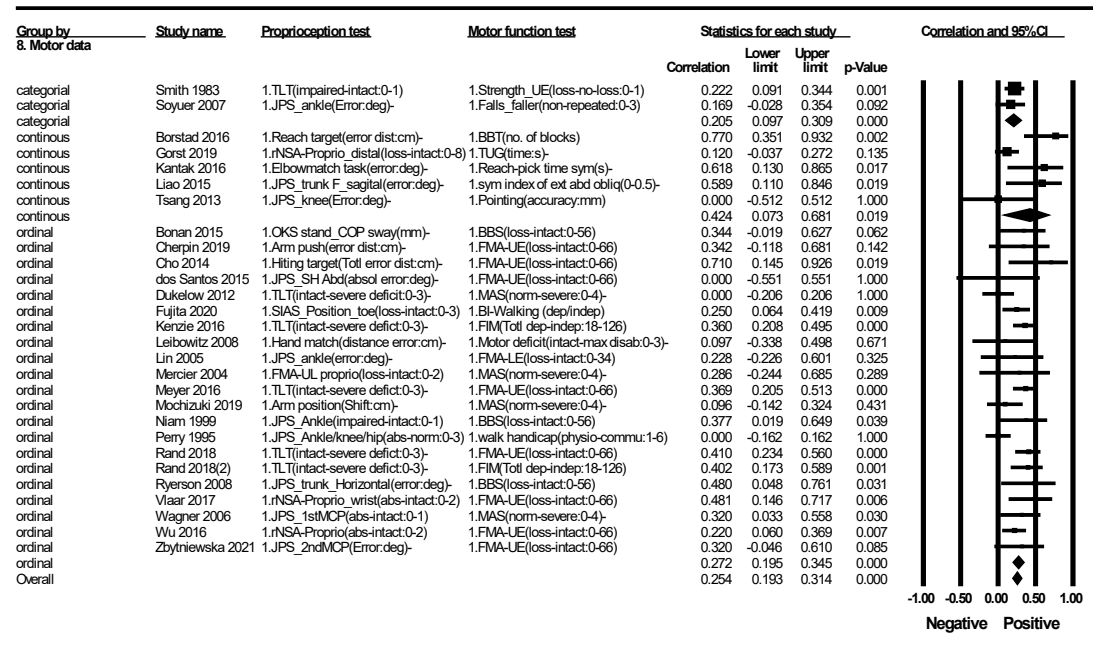

(H) Random-effect model of analysis:  $I^2=0\%$ , 70%\*, 42%\* across studies measuring motor function with continuous, ordinal and categorical data as results respectively. (\*:p<0.05)

Appendix I (full version for Figure 3): Subgroup analysis: association of proprioception with motor function after stroke. (A) Difference between proprioception subtypes measured in the tests (between-group difference: p=0.456). (B) Influence of body parts involved in the proprioception tests (between-group difference: p=0.055). (C) Influence of matching side involved in the proprioception tests (side involved) (between-group difference: p=0.050). (D) Influence of the movement modes involved in the proprioception tests (between-group

difference:  $p=0.380$ ). (E) Influence of joint planes measured in the proprioception tests (between-group difference:  $p=0.205$ ). (F) Influence of result acuity of the proprioception tests (between-group difference:  $p=0.710$ ). (G) Influence of ICF motor function domains (between-group difference:  $p=0.003$ ). (H) Influence of result acuity of the proprioception tests (between-group difference:  $p=0.364$ ).
