# Supplementary material for: Correlation Between Proprioceptive Impairment and Motor Deficits After Stroke: A Meta-Analysis Review
Source: PubMed Central journal article supplement (PMC8793362; doi:10.3389/fneur.2021.688616), 2022-01-13
Supplement: Data_Sheet_2.pdf [file Data_Sheet_2.pdf]

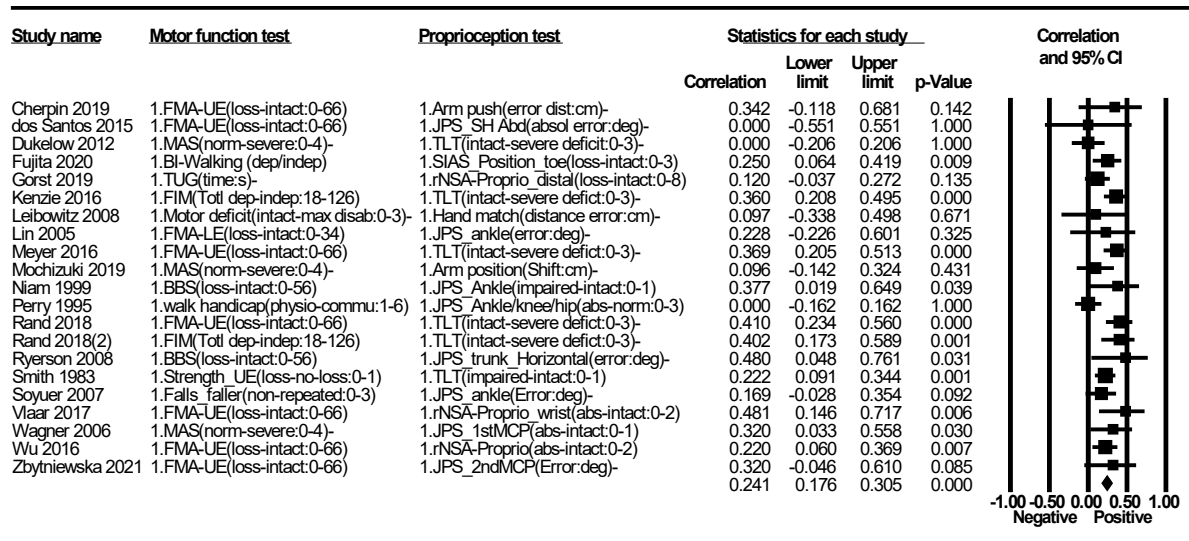

Appendix II. Meta-analysis on studies with a sample size of 20 and above: Association between proprioception and motor function after stroke.

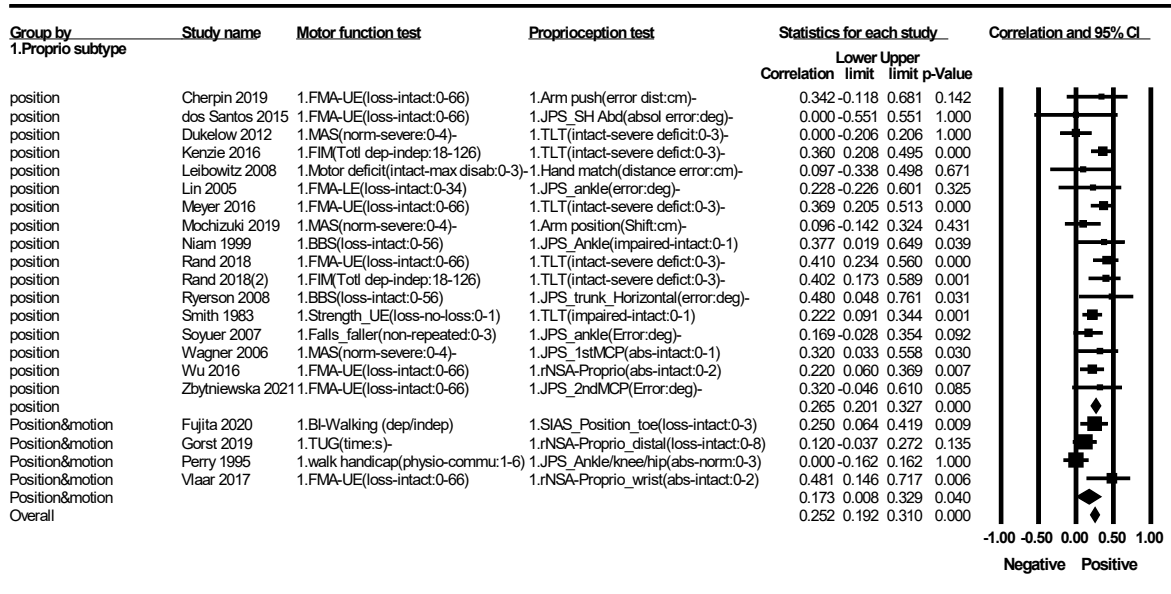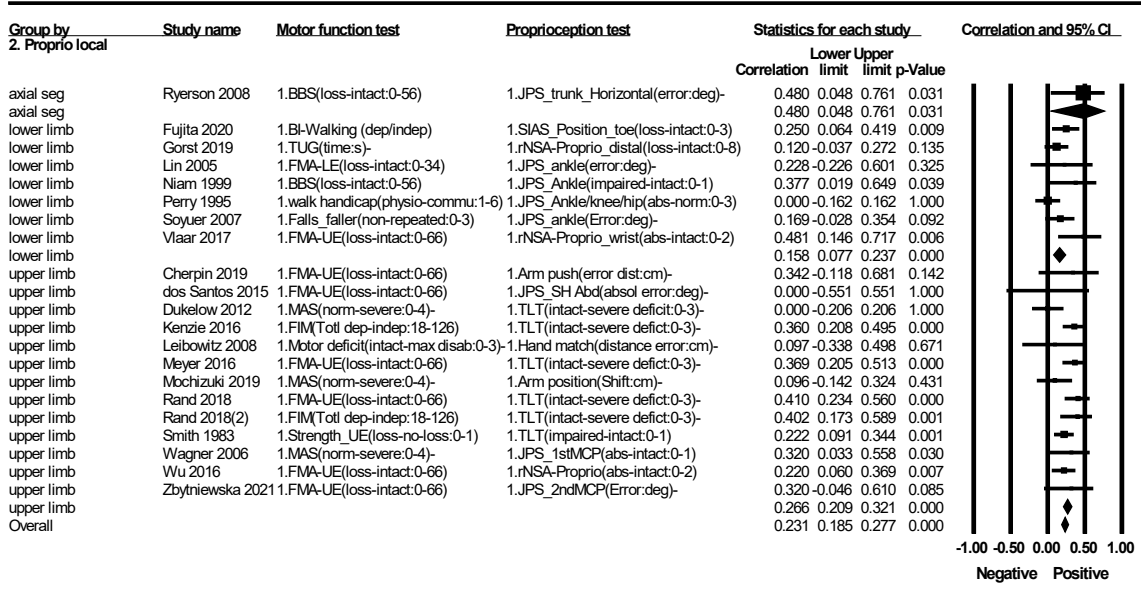

(B) Fixed-effect model of analysis:  $I^2=0\%$ , 34%, 41% across studies measuring proprioception in axial segment, upper limbs and lower limbs respectively. ( $p>0.05$ )

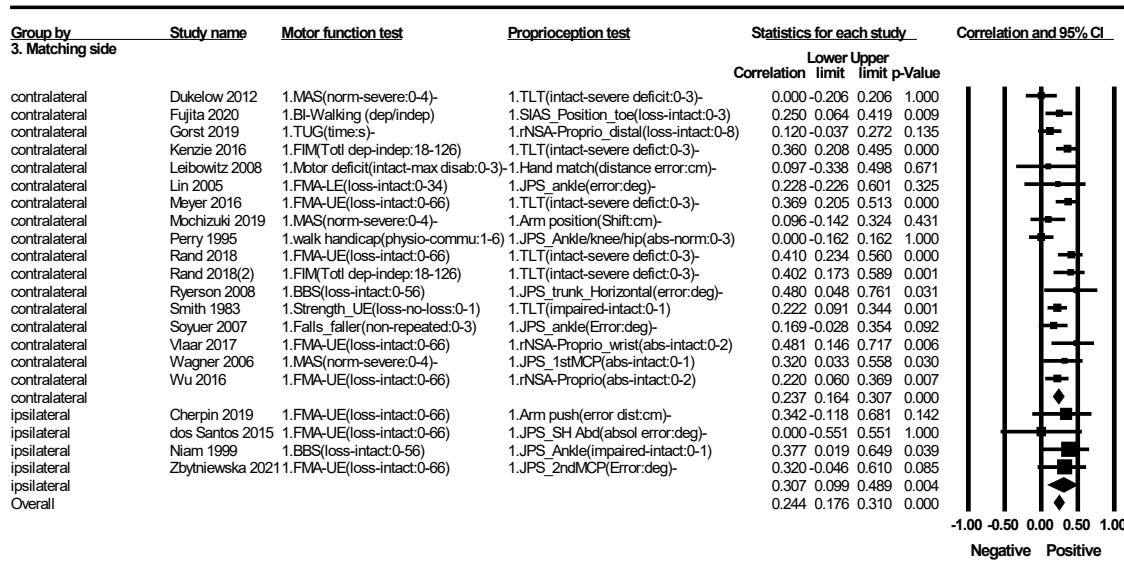

(C) Random-effect model of analysis:  $I^2=0\%$ , 51%\* across studies measuring proprioception in contralateral matching and ipsilateral matching respectively. (\*:p<0.05)

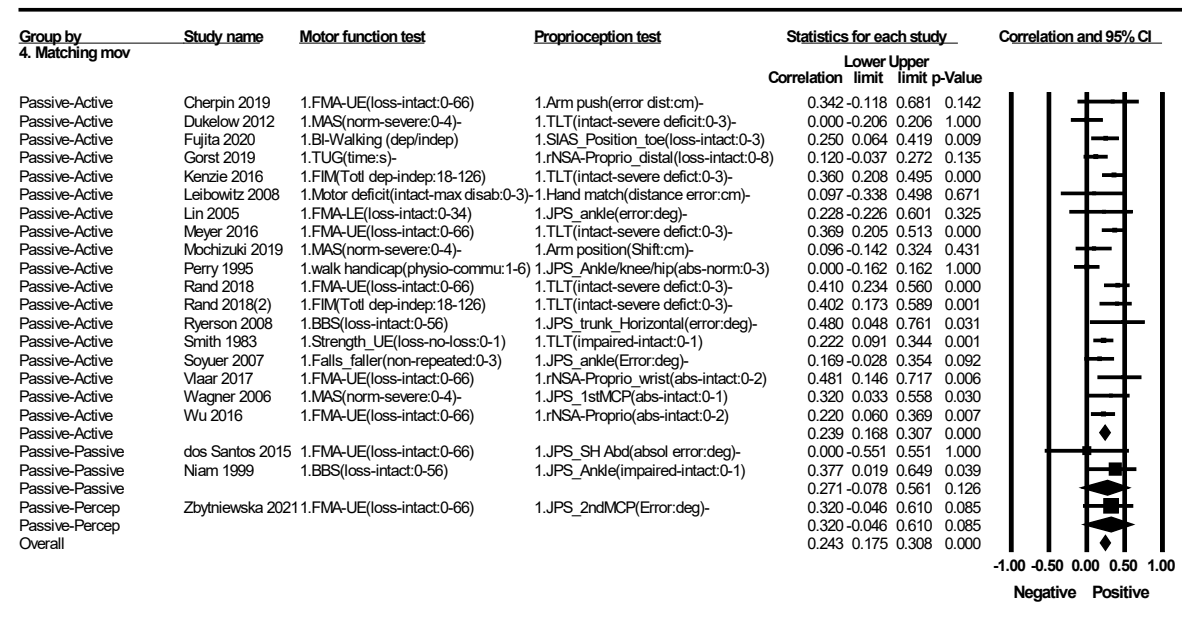

(D) Random-effect model of analysis:  $I^2=49\%$ \*, 13%, 0% across studies measuring proprioception in different movement modes respectively. (\*:p<0.05)

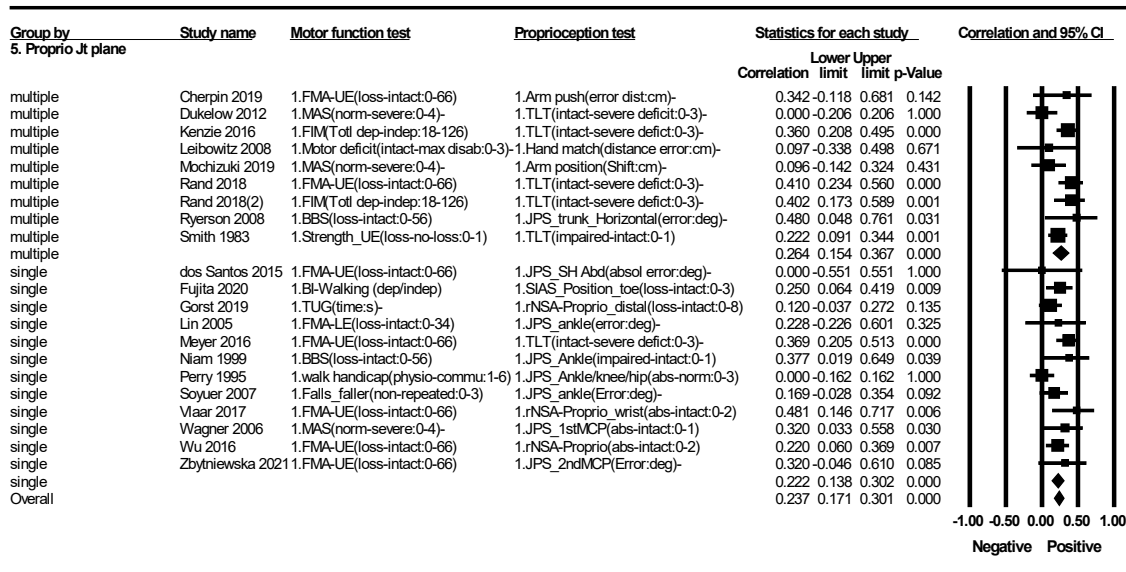

(E) Fixed-effect model of analysis:  $I^2=51\%^*$ , 35% across studies measuring proprioception in single and multiple joint planes respectively. (\* $p<0.05$ )

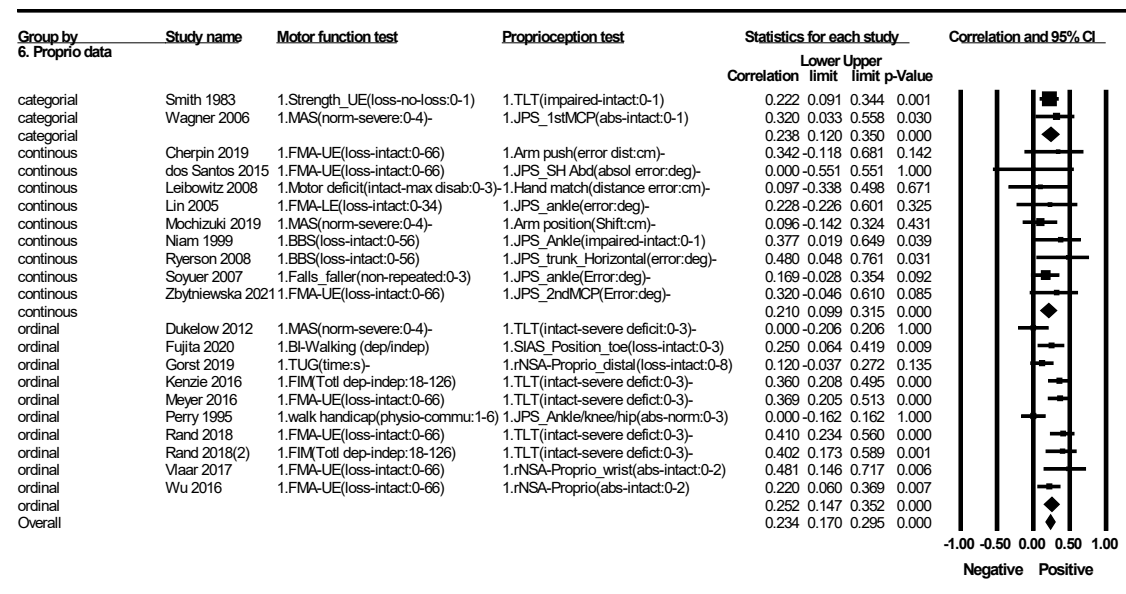

(F) Random-effect model of analysis:  $I^2=0\%$ , 0%, 69%\* across studies measuring proprioception with continuous, ordinal and categorical data as results respectively. (\* $p<0.05$ )

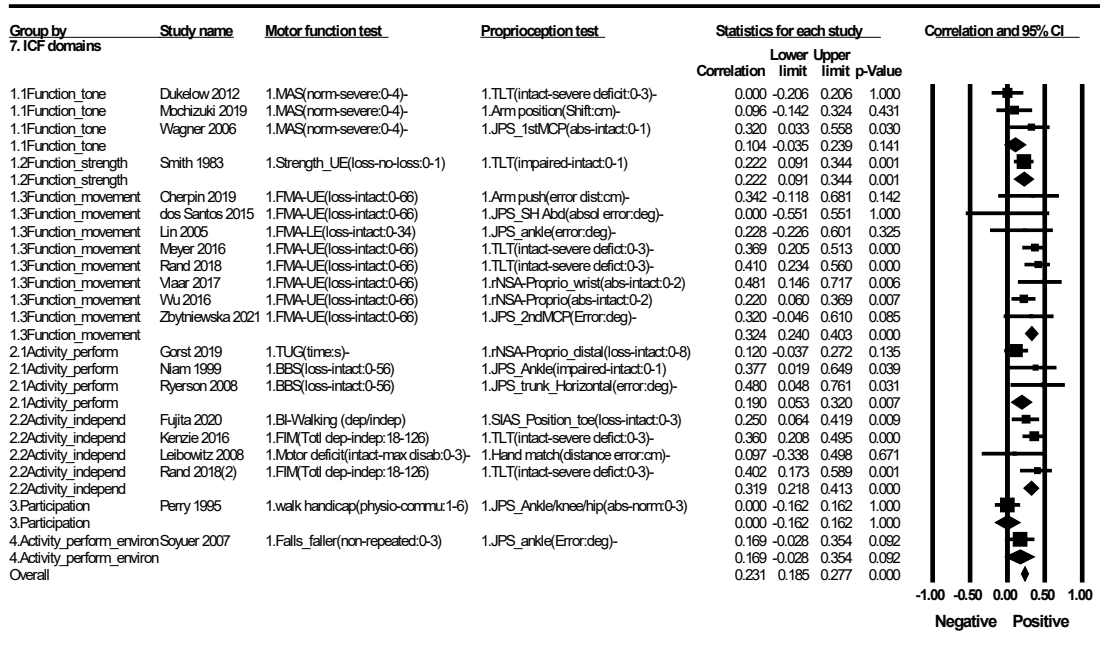

(G) Fixed-effect model of analysis:  $I^2=37\%$ , 0%, 0%, 47%, 0%, 0% across studies measuring motor function in ICF domains 1-4 respectively. ( $p>0.05$ )

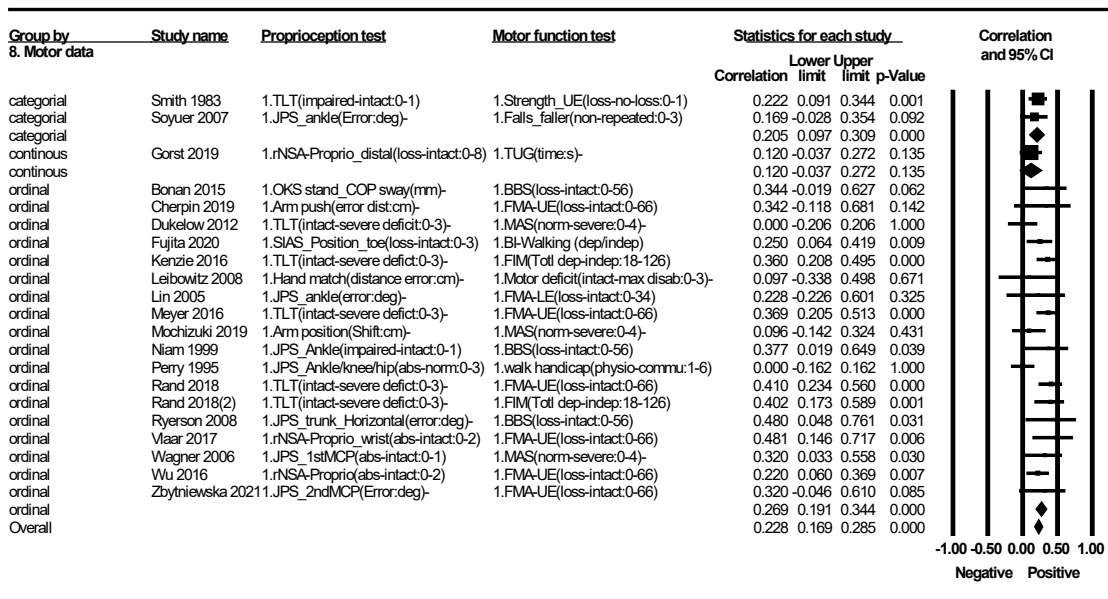

(H) Random-effect model of analysis:  $I^2=0\%$ , 0%, 45%\* across studies measuring motor function with continuous, ordinal and categorical data as results respectively. (\*: $p<0.05$ )

**Appendix III.** Subgroup analysis on studies with a sample size of 20 and above: association of proprioception with motor function after stroke. (A) Difference between proprioception subtypes measured in the tests (between-group difference:  $p > 0.05$ ). (B) Influence of body parts involved in the proprioception tests (between-group difference:  $p > 0.05$ ). (C) Influence of matching side involved (side involved) in the proprioception tests (between group difference:  $p > 0.05$ ). (D) Influence of movement modes involved in the proprioception tests

(between group difference:  $p > 0.05$ ). (E) Influence of joint planes measured in the proprioception tests (between-group difference:  $p > 0.05$ ). (F) Influence of the result acuity of the proprioception tests (between-group difference:  $p > 0.05$ ). (G) Influence of ICF motor function domains (between-group difference:  $p < 0.05$ ). (H) Influence of the result acuity of the motor function tests (between-group difference:  $p > 0.05$ ).
